# Supplementary material for: Structure and interactions of the Bacillus subtilis sporulation inhibitor of DNA replication, SirA, with domain I of DnaA
Source: PubMed Central journal article supplement (PMC4285326; doi:10.1111/mmi.12713), 2014-08-05

# Supplementary Figure 2

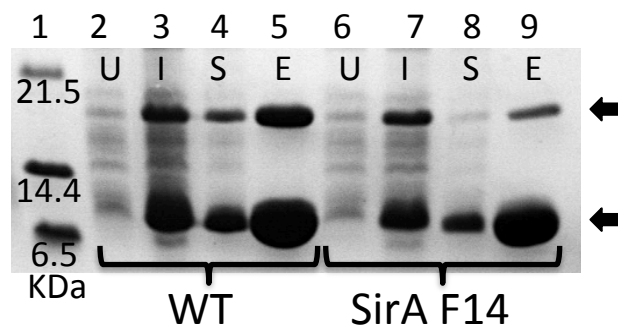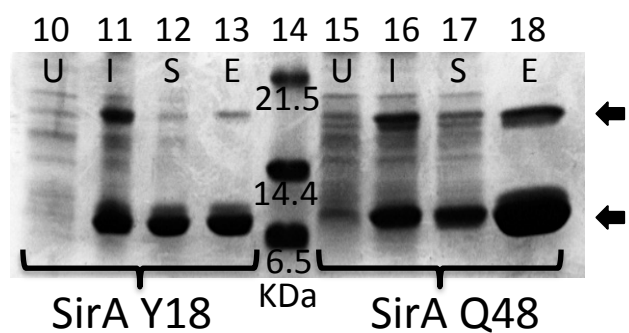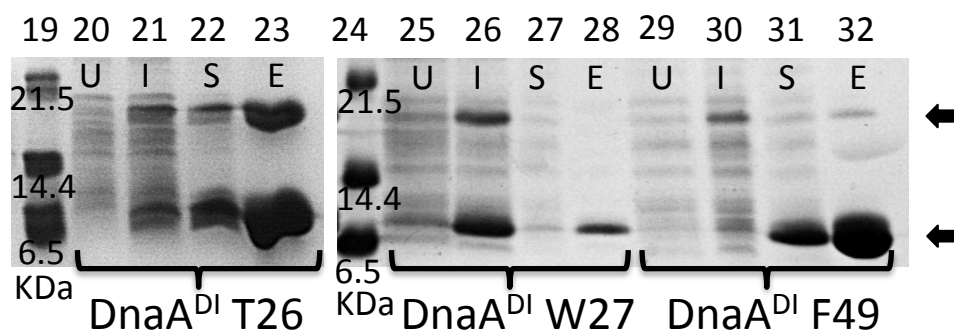

Supplement: mmi0093-0975-SD2.pdf [file mmi0093-0975-SD2.pdf]
